# Supplementary material
Source: publisher figshare collection journal article supplement (https://gsapubs.figshare.com/ndownloader/files/23313674)
Supplement: Supplementary file 1 [file 23313674]

## Sheet: Shallow shelf
Sovetashen				Balvany				Kurdistan				Jesmond				Lung Cam				Nhi Tao				Zuodeng				Cili				Demirtas				Zal
Sample (cm)	Al2O3 (wt%)	CaO (wt%)	MgO (wt%)	Sample (cm)	Al2O3 (wt%)	CaO (wt%)	MgO (wt%)	Sample	Al2O3 (wt%)	CaO (wt%)	MgO (wt%)	Sample (m)	Al2O3 (wt%)	CaO (wt%)	MgO (wt%)	Sample (m)	Al2O3 (wt%)	CaO (wt%)	MgO (wt%)	Sample (m)	Al2O3 (wt%)	CaO (wt%)	MgO (wt%)	Sample (cm)	Al2O3 (wt%)	CaO (wt%)	MgO (wt%)	Sample (m)	Al2O3 (wt%)	CaO (wt%)	MgO (wt%)	Sample (m)	Al2O3 (wt%)	CaO (wt%)	MgO (wt%)	Sample (m)	Al2O3 (wt%)	CaO (wt%)	MgO (wt%)
380	3.93	44.2	0.66	1440	0.492651	54.284	0.592317	BM1	3.37	46.07	0.89	91.7	0.191302	56.2518	0.567885	5	3.65029	40.7631	1.25137	7.25	4.1597	39.1916	2.48869	8690	0.997001	56.0447	1.21562	17.3	0.648913	53.3733	0.506923	14.75	0.237194	55.4683	0.711252	740	0.464356	30.2219	21.2586
360	0.89	54.01	0.22	1400	0.510066	54.6348	0.545862	BM2	7.03	35.89	1.61	91	1.43852	30.9224	20.1036	4.95	4.27384	36.0496	2.06895	7.04	3.834	37.9945	1.75677	8660	2.85267	47.8156	0.307232	14.4	0.159236	56.1417	0.594378	13.75	0.228751	55.8346	0.219516	734	0.844091	31.8922	18.9281
20	3.58	46.3	0.72	1350	0.472868	54.4839	0.504882	BM3	0.32	53.97	0.37	90.3	0.461011	48.1911	6.65065	4.9	6.03033	29.1071	2.3528	6.9	4.6029	34.1048	2.59763	8630	0.867462	50.1701	0.56684	9.7	0.371793	54.707	0.463696	11.25	0.470549	53.9207	1.15468	731	0.319027	52.9461	1.7118
18	5.19	43.11	0.91	1285	0.397813	53.7138	0.56054	BM4	8.18	31.99	1.3	90	1.22943	30.0561	19.9548	4.85	4.33359	36.7115	1.64689	6.65	2.93847	44.414	0.595078	8600	1.74332	49.5271	0.166157	6.52	0.607633	48.6554	5.2864	9.75	0.272884	55.282	0.769136	728	0.118905	31.0884	21.1727
16	6.05	39.17	1.04	1240	0.448983	54.429	0.451269	BM5	0.38	51.74	1.89	89.8	0.108448	56.0149	0.454374	4.8	2.97749	41.8042	1.47453	6.41	3.29405	46.5799	0.989228	8540	0.277343	52.8951	0.209751	6.19	0.599315	52.1856	2.42593	8.25	0.291392	52.9705	2.46793	715	1.02424	28.752	20.1663
13	5.92	38.93	1.17	1185	0.26269	54.5135	0.533306	BM6	6.79	35.24	1.84	87.7	0.122989	54.9712	1.27943	4.75	2.25218	43.7865	1.07912	6.25	3.54923	44.3675	1.59409	8510	2.43347	45.458	0.251415	5.4	1.39151	44.3844	7.16178	6.25	0.270783	55.3758	0.605159	703.2	0.438608	29.8422	20.9174
10	6.65	37.12	1.1	1145	0.410631	54.885	0.492445	NM1	3.4	42.79	0.72	87.7	0.120849	55.5666	0.644993	4.7	3.46507	43.5928	0.798669	6.05	2.84573	47.415	0.831285	8490	0.526236	55.3871	0.515151	4.5	0.741064	37.7021	13.9636	5.75	0.224903	55.5061	1.0013	700.2	0.787523	30.0836	20.8982
8	7.09	33.95	1.06	995	0.546062	54.7589	0.554458	NM2	3.87	44.49	1.25	87.7	0.00210692	54.742	0.607642	4.65	1.3961	48.9781	0.934187	5.88	3.28393	44.3661	0.964472	8470	3.10091	54.1711	1.124	3.99	0.989748	33.1371	17.348	4.25	0.36578	53.8186	1.77773	690.5	0.525438	25.1429	19.5282
6	8.11	35.02	1.28	942	0.245614	54.0449	0.635229	NM3	1.05	51.83	1.01	87.6	1.14243	30.2641	19.3671	4.6	1.81956	48.4737	0.71495	5.65	5.55009	32.4708	3.48783	8450	1.13092	52.1107	1.6491	2.75	0.86103	34.1468	17.3589	3.2	0.135064	55.181	0.925267	683.9	0.512561	32.8855	19.1413
4	10.59	28.24	1.47	915	0.485581	54.4695	0.433414	NM4	5.85	38.99	1.45	85.2	1.24768	29.1156	19.4481	4.55	1.85197	47.5688	0.537026	5.5	6.11808	31.2986	4.0134	8420	0.436654	54.6828	0.847534	1.9	0.982343	33.1914	17.2683	2.85	0.456978	54.19	0.810337	654.9	0.620666	53.2173	0.864026
2	10.71	28.74	1.5	897	0.448459	54.5366	0.432561	NM5	0.82	51.04	0.41	84.2	1.42253	29.1772	19.7389	4.5	2.18312	47.0987	0.633303	5.35	4.25775	34.7693	3.23332	8390	0.713092	56.4065	0.9189	1.25	0.420583	44.484	9.44298	2.1	0.441392	53.8509	1.083	645.2	0.655232	53.0587	1.00569
0	8.77	34.99	1.2	890	0.559081	54.5823	0.377167	NM6	17.67	3.71	3.28	78.8	1.32114	31.5894	20.1004	4.45	3.35461	41.8997	0.813277	5.15	4.86487	39.005	2.34574	8340	1.08863	55.931	1.25302	0.7	1.13865	37.2225	14.1864	1.5	0.538928	51.6049	2.8419	626.5	0.233743	30.2956	21.3683
-4	1.51	51.62	0.56	870	0.0285675	53.9815	0.321992					76.2	1.20604	31.9769	18.9386	4.4	2.9526	36.4126	3.67045	4.9	5.2237	34.8272	2.4348	8300	2.18057	48.4163	0.289785	0	0.382348	35.6607	16.9017	0.8	0.735199	53.8891	0.395909	614.3	0.609877	30.0834	20.5455
-60	1.83	49.65	0.63	860	0.145582	53.819	0.438344					73.9	1.38557	30.961	19.7506	4.35	4.38467	33.8117	2.78261	4.65	3.0988	43.2175	1.16317	8140	0.848324	57.6288	1.49443	-0.2	0.0106285	56.1839	0.486117	0.7	0.936743	53.314	0.730877	592	1.48699	49.891	1.06502
-130	0.7	53.66	0.37	837	0.170827	53.5445	0.423206					71.9	1.35163	29.5515	19.8179	4.3	3.0649	43.2968	1.20944	4.55	3.22887	43.3598	0.888516	8070	2.77385	44.8518	3.49115	-2	0.0171408	56.3011	0.422455	0.6	0.818723	52.676	1.38003	574.35	0.654364	52.5895	0.715915
				807	0.128693	54.1293	0.553159					70.8	1.10617	31.5167	19.4404	4.25	1.76334	48.1729	0.9225	4.2	2.60816	47.6841	0.513425	8040	3.43463	41.3144	2.04996	-6	0.0175419	56.3131	0.438004	0.4	0.732094	52.9622	1.1354	565.7	0.565881	52.5311	0.840123
				790	0.725432	53.5806	1.27028					69	1.23003	30.7619	20.0946	4.2	2.05263	45.0863	1.41447	4.07	3.22167	46.2242	0.597793	8000	2.71371	45.1501	3.38502	-8	0.0401594	56.2567	0.491735	0.16	1.10614	52.5469	0.523579	554.6	0.490788	52.4564	1.08637
				750	0.791531	53.0571	0.68848					68	1.1825	29.5884	20.3642	4.15	3.86159	37.6048	1.9054	3.96	3.28474	43.5013	0.431278	7970	2.34551	48.9867	2.04832	-13.6	0.0322789	56.0323	0.569812	0.05	0.870121	53.6513	0.456705	548.8	2.47919	51.145	0.703826
				735	1.58038	50.7813	1.24712					66	1.33945	29.4653	20.3203	4.1	2.95626	37.27	2.26047	3.83	2.87301	45.7394	0.86636	7870	5.38281	37.6682	4.56454	-17.6	0.0129731	55.9081	0.78194	0	0.60321	53.5132	0.567374	544.35	0.872766	51.9509	1.15736
				710	1.60866	50.5794	0.605594					65.8	1.44029	30.1028	20.5439	4.05	2.43796	43.1812	1.67871	3.7	3.00918	45.0123	0.847394	7840	3.53997	43.9394	4.22547	-26.1	0.0135739	55.7069	0.940126	-0.5	0.404501	54.4265	0.579363	529.1	0.934473	51.8867	0.555297
				675	2.02211	49.9063	0.824261					62	1.3064	29.2123	20.0836	4	2.73878	42.9241	1.59772	3.6	39.0128	3.48963	2.94552	7810	2.19652	45.2054	2.66541					-0.8	1.0633	52.4902	0.615337	513.6	1.13757	52.7134	0.883603
				648	2.80617	47.3103	0.653268					60.55	1.01326	29.0258	20.5384	3.95	2.36711	43.7863	1.75195	3.56	2.40244	47.1739	0.797642	7750	2.77637	44.4779	3.87293					-1.1	0.502261	53.7301	0.535174	512.5	0.246223	54.1861	0.719547
				618	2.48878	48.3294	0.600267					59.1	0.359961	53.5311	1.96349	3.9	2.45523	43.2422	1.73522	3.53	0.264245	54.0606	0.924969	7700	3.64703	43.9415	3.26746					-1.7	1.03379	51.7225	0.623011	504.3	0.183277	54.9455	0.702813
				595	2.21074	49.2221	0.575642					58.6	0.676263	39.8438	12.3551	3.85	2.73335	40.7684	2.37831	3.49	0.174845	53.4885	0.90482	7660	3.4373	45.4063	1.99743					-2.3	0.693848	53.0353	0.547305	491.5	0.106637	55.5946	0.579126
				575	2.60673	47.389	0.665883					56.6	1.09963	29.331	19.9169	3.8	2.5662	43.9993	1.34799	3.45	2.41569	47.1149	0.680079	7570	1.85168	48.5511	2.06189					-3.5	0.573007	53.9235	0.788126	487.5	0.353306	54.4834	0.90533
				552	5.43682	40.4082	0.673299					55.6	1.34983	29.0949	19.364	3.75	3.60404	36.6385	2.75151	3.42	1.99239	47.8714	0.394833	7510	1.27171	55.9026	2.00343					-4.4	0.295285	54.3084	0.864833	478.5	0.513363	54.5713	0.495026
				548	2.82133	46.3584	0.663334					55	1.50229	30.077	18.7061	3.7	2.89881	39.6649	2.42645	3.38	0.72848	50.3082	0.843822	7480	1.03859	55.0419	2.1678					-5	0.677407	52.6115	0.726922	474.5	0.490271	54.3719	0.421121
				530	1.93751	48.2961	0.5217					54.5	1.00815	28.2117	21.2314	3.65	1.89049	46.2261	1.24228	3.34	0.5	53.9785	0.551459	7330	1.87686	44.6489	2.17964					-6.1	1.03958	52.63	0.661835	467.5	0.292012	54.4772	0.471357
				516	0.600128	52.4788	0.617176					54.25	1.44901	31.2652	20.142	3.6	2.82358	44.5567	1.17124	3.3	2.49161	47.5825	0.522152	7300	1.4107	48.4545	2.34127					-7.1	1.91391	50.2358	0.703836	462.5	0.265429	54.9995	0.417237
				490	1.39865	51.0413	0.521354					54	1.18863	30.721	20.1838	3.55	3.0582	40.7429	1.98963	3.26	3.93365	44.4211	1.43345	7220	1.81747	49.1254	2.03826					-8.6	1.15733	47.0061	3.637	457.5	0.115757	55.3256	0.419
				468	0.745683	51.9623	0.411802					53.6	1.24409	35.3012	17.4633	3.5	2.78262	41.2403	2.08523	3.23	1.82798	46.9681	1.35666	7170	1.59926	49.273	2.01287					-10.1	0.660504	53.5796	0.746214	452.5	0.422068	54.6682	0.673451
				451	1.08446	52.1342	0.478117					53.4	0.250547	25.1886	19.1133	3.45	2.97086	43.3362	1.14625	3.2	2.36321	44.4779	1.40419	7130	2.45359	46.3844	2.44508					-16.6	0.879338	52.7632	0.641947	447.5	0.217682	54.8903	0.575019
				435	0.485054	54.8208	0.399883					52.85	1.50015	47.8995	4.48823	3.35	1.70623	48.4161	0.586718	3.15	2.79488	46.5857	1.48557	7100	2.02556	45.5823	2.66023									446.5	0.309371	55.3726	0.555157
				420	1.28109	51.3239	0.427685					51.85	1.12282	27.8465	21.1424	3.3	2.79477	45.9085	1.03634	3.12	2.56779	48.4499	1.33238	7060	1.86436	46.8033	2.21747									443.5	0.133453	55.301	0.410819
				382	1.58558	51.2367	0.400067					50.35	0.771489	53.0847	0.925201	3.25	3.44886	42.5334	0.382412	3.1	3.24427	42.138	1.69477	7030	2.98644	40.8751	5.64087									439.5	0.220329	51.5983	3.03015
				372	1.30688	51.4435	0.423184					50.05	1.57175	30.8727	20.2437	3.2	1.647	47.4556	0.861621	3.05	1.24082	52.122	1.03162	6990	1.60399	48.3086	2.42093									434.5	0.297762	54.5009	0.462911
				350	0.905039	52.4352	0.539375					49.35	0.741215	31.6503	17.6632	3.15	1.23657	49.1512	0.908352	3	4.47223	42.0097	1.46585	6960	1.32875	48.0749	2.44124									429.5	0.18458	53.6645	1.93533
				322	1.20212	51.5764	0.524052					48.05	1.15958	29.6544	19.8214	3.1	2.47991	44.8248	0.970501	2.95	4.04793	40.1616	1.32686	6885	4.89466	43.268	1.90328									413.5	0.251307	52.5091	0.940369
				300	0.900959	52.6018	0.602876					47.35	0.508068	49.5663	4.93339	3.05	2.08615	45.9065	1.14919	2.9	1.76424	47.262	1.35388	6870	1.33543	49.1334	2.03877									406.5	0.250039	53.0959	0.667178
				240	2.6169	46.7938	0.680689					47.25	1.21635	29.6205	19.958	3	2.30069	43.6213	1.63687	2.85	2.6675	40.9176	1.94056	6490	0.996764	52.0827	1.11535									394.4	0.348967	53.7305	0.668377
				234	0.939742	51.7655	0.33638					46.55	1.3035	30.7305	18.8631	2.95	3.16302	40.4196	1.91833	2.78	3.92329	43.3558	2.21803	6450	0.884259	50.6198	1.20768									393	0.216054	54.9317	0.473646
				230	0.43362	50.7787	0.304106					46.15	1.26408	30.3091	20.2972	2.9	1.57696	45.2666	1.96384	2.7	1.20636	49.528	1.03248	6420	3.02041	43.4117	0.81681									391	0.684919	53.6448	0.559505
				220	0.719016	52.1804	0.389341					45.75	1.32253	31.1957	19.4511	2.85	1.22617	49.1972	1.12197	2.65	1.2977	52.6049	0.765815	6380	1.3563	50.6676	1.17258									389.8	0.501763	53.9948	0.633526
				215	0.446449	53.3053	0.333564					45.5	1.02126	29.1227	20.1222	2.8	0.930045	50.1109	1.2125	2.6	1.92061	50.6256	0.38699	6350	0.90381	50.1774	1.17698									383.3	0.651873	53.7068	0.579985
				208	0.572192	52.9946	0.340995					45.35	0.402335	17.2566	15.3696	2.75	2.57247	43.2977	1.76713	2.55	4.28202	35.3519	2.39166	6320	0.375146	53.1093	0.728508									379.8	0.430201	54.1667	0.689746
				204	0.161687	53.991	0.334969					44.9	1.11901	30.7491	19.6704	2.7	1.83565	43.9711	1.52565	2.5	4.16622	35.8838	2.27197	6290	0.545255	53.5354	0.687578									378.5	0.219853	54.6494	0.542638
				199	0.808037	49.6972	0.311722					44.8	1.19251	31.4894	19.2941	2.65	2.55972	43.3701	0.95454	2.45	2.31439	48.3907	0.93721	6250	0.966173	49.8628	0.46801									374.3	0.306984	55.1278	0.681395
				188	0.970826	52.6734	0.50776					43.95	1.28538	30.7706	20.6934	2.6	3.23127	34.2465	3.11918	2.38	0.85527	49.7938	1.04739	6220	1.1797	52.5125	0.484464									369.2	0.465876	54.269	0.516344
				180	0.302964	52.9474	0.293659					42.75	1.13411	30.1264	19.9284	2.55	3.36775	28.9938	5.18704	2.34	1.3613	48.2301	1.34659	6190	0.646083	51.7817	0.962146									361.6	0.815324	52.0715	0.86418
				171	0.451798	53.2164	0.557744					41.95	1.20716	30.5036	20.1429	2.5	3.65598	25.1229	6.66593	2.3	1.96261	48.1354	1.02422	6150	1.29307	51.4473	0.446557									348	3.44726	42.7669	1.48134
				165	0.872124	52.2836	0.419458					41.35	1.19684	29.7138	20.5289	2.45	3.33591	40.2233	0.413304	2.25	1.5268	52.7527	0.937835	6110	0.52734	53.2424	0.463748									346	1.32041	49.9878	0.852461
				156	0.553225	53.2371	0.456296					41.15	1.20486	29.3231	19.339	2.3	0.631775	1.20799	0.0246571	2.2	0.493866	53.6735	0.823713	6080	0.382582	55.2295	0.631685									345.5	1.014	50.6449	0.993617
				152	0.947631	52.0345	0.360825					40.65	1.2342	29.9443	20.0744	2.25	0.862948	1.13342	0.034367	2.15	2.04135	49.2178	0.431064	6050	0.739392	52.2815	0.636389									343	3.07932	43.4783	1.66942
				147	0.945198	50.4203	0.356371					40.35	1.21613	31.8183	18.9787	2.2	0.547952	53.9566	0.379717	2.1	1.24858	50.6154	0.553226	6020	0.646771	55.9529	0.861194									335.5	1.53227	49.4906	0.881368
				142	1.77101	50.3791	0.482763					39.75	1.12642	28.6599	20.5257	2.15	0.431538	54.176	0.366003	2.02	8.85394	22.4407	0	6000	0.648366	52.3527	0.577973									315.2	4.20059	38.7074	2.83339
				138	1.27683	50.7569	0.493776					38.7	1.1361	31.715	18.8684	2.1	0.494309	53.272	0.393804	1.95	1.84963	49.7467	0.429275	5970	0.861922	51.2113	1.17263									314.4	3.07129	44.6064	2.02463
				133	1.70575	48.9823	0.397912					38.25	1.35247	30.2646	20.2573	2.05	0.393512	54.655	0.340683	1.9	0.507824	51.9175	0.871015	5940	0.790557	52.161	0.448923									262.15	0.606578	53.0899	0.986772
				122	3.88948	44.7306	0.593076					37.05	0.981249	28.8497	20.3808	2	0.673973	53.3379	0.295509	1.82	1.2	54.3304	0.500253	5910	1.13008	48.9234	0.592316									242.6	2.79744	45.5492	1.85883
				114	4.31395	42.505	0.504088					35.9	0.916906	29.2943	20.1608	1.95	0.262915	55.0163	0.288342	1.75	2.00201	48.8854	0.263169	5880	0.574758	53.9084	0.383614									178	3.28283	48.9111	1.10703
				102	2.16648	48.7101	0.726565					35.7	0.597242	49.7918	3.63712	1.9	0.355804	55.4044	0.208667	1.7	2.02	55.6859	0.476592	5840	0.381838	53.1832	0.452898									165	9.15346	25.1458	2.43968
				92	11.3721	26.5775	0.72486					35.15	1.19492	28.0248	19.7825	1.85	0.281668	54.9687	0.316425	1.65	2.04	54.1047	0.460844	5800	0.90529	51.4832	0.705097									160	1.98648	48.3219	1.02622
				80	21.5945	18.4964	1.82396					34.9	2.19997	27.9777	17.5854	1.8	0.13236	54.6441	0.2657	1.6	2.06353	48.6465	0.475951	5770	0.66816	56.3566	0.8246									140	2.69598	49.8798	0.778161
				66	24.6359	13.456	2.41746					34.65	1.03556	28.9524	18.9227	1.75	0.206779	53.5467	0.286506	1.55	1.3	54.0661	0.593374	5730	0.795939	55.1001	0.740146									125	1.12307	50.3249	1.33682
				54	18.6924	19.9112	2.22808					34.5	0.555736	26.1104	18.3361	1.7	0.425856	52.4596	0.458297	1.5	0.61519	54.6093	0.54561	5705	0.826351	56.9917	0.410981									110	3.25817	49.3506	1.09305
				42	16.2473	20.8366	2.71861					34.5	1.18217	31.8835	18.8436	1.65	0.17849	52.7601	0.403275	1.45	1.80312	48.6136	0.236365	5670	0.610309	56.252	0.79325									45	4.69606	44.5923	2.04773
				32	23.5987	10.3637	2.46248					34.25	1.38466	29.239	20.4681	1.6	0.67303	55.1263	0.186638	1.42	1.83	52.8201	0.509054	5640	1.02919	52.0299	0.336526									30	0.203248	54.2147	0.3431
				10	23.8371	14.7158	2.66843					33.4	1.07162	31.7058	19.086	1.55	0.0961586	57.7764	0.315064	1.38	1.86	52.2706	0.499826	5490	1.73998	50.9892	0.677331									-5	3.59041	46.0954	1.6054
				2	5.20684	39.3329	1.81116					32.5	1.27785	32.2983	19.4333	1.5	0.0991937	57.2563	0.242124	1.34	1.88705	48.7165	0.155344	5470	0.837081	57.0175	0.82816									-15	2.89751	49.6599	1.45755
				-2	4.47556	43.0042	1.2785					31.85	0.912206	29.4481	19.5458	1.45	0.120069	55.8306	0.321689	1.3	2.3	55.3575	0.439403	5420	2.06699	44.2551	0.413556									-20	1.94985	52.6093	1.20473
				-6	3.39814	45.8955	1.16004					31.8	0.988483	29.8977	18.489	1.4	0.396296	57.1518	0.247314	1.25	2.7053	52.3156	0.6011	5390	0.584713	56.1968	0.688915
				-10	3.95864	45.088	1.06792					31.7	1.17553	30.424	19.7111	1.35	0.616408	55.6181	0.171753	1.2	2.41359	50.2969	0.523733	5370	0.780758	50.9482	0.456812
				-17	2.19165	48.8467	0.605261					31.55	1.06956	30.3152	19.2648	1.3	0.223965	56.733	0.231259	1.15	1.9	53.1147	0.487068	5330	1.61053	51.5409	0.299521
				-25	4.56599	44.5408	1.50456					31.45	1.28871	31.4591	19.4997	1.25	0.421419	55.5569	0.249342	1.1	1.3	55.3353	0.379431	5300	1.58988	51.3823	0.245998
				-50	1.07016	50.3362	0.723186					31.35	1.13795	30.8037	18.8759	1.2	1.0912	47.6134	0.349716	1.05	0.803189	51.8504	0.287695	5270	2.56519	50.5909	0.671593
				-75	0.882634	52.6816	0.664371					31.2	0.968755	28.42	20.1053	1.15	0.432987	48.1738	0.319268	1	1.3	32.2458	0	5230	1.27865	50.8259	2.06849
				-90	0.344916	54.0606	0.565895					30.8	1.33334	29.5478	20.606	1.1	4.64864	46.7019	0.310067	0.95	1.9	53.8946	0.476673	5200	0.817797	49.7882	0.843628
				-100	0.2362	54.912	0.6194					30.7	1.1565	29.1741	19.8148	1.05	0.402004	48.2386	0.451614	0.9	2.44329	48.2695	0.225308	5180	0.566438	53.4367	0.454172
				-120	0.510892	54.2803	0.627315					30.2	1.51544	28.2207	19.0863	1	0.513597	52.5824	0.301885	0.85	2.3	52.6925	0.455095	5150	0.864344	52.9277	0.416987
				-140	0.49019	54.4081	0.648727					30.1	1.32328	30.0804	16.894	0.95	0.204204	51.551	0.351491	0.8	2.15	53.4704	0.428013	5120	0.641876	51.6875	2.01081
												29.9	1.20585	30.201	19.0016	0.9	1.12964	53.473	0.115016	0.75	2.00247	49.0476	0.0614739	5095	0.711218	51.1766	0.657963
												29.3	0.893404	30.6361	19.9282	0.85	0.337207	55.5203	0.146875	0.7	1.7	53.3418	0.516094	5080	1.1708	50.3476	1.17664
												28.5	0.525516	45.3994	8.24189	0.8	0.38965	54.3146	0.371447	0.65	1.4	54.0281	0.507864	5060	0.888067	52.1228	0.999426
												28.3	0.968826	32.1477	18.6864	0.75	0.260598	55.6175	0.171649	0.6	1.09276	48.5171	0.213094	5040	0.871632	49.2304	1.14048
												27.05	1.08813	30.3293	20.029	0.7	0.290719	56.1602	0.215003	0.55	1.5	24.3221	0	5030	1.30728	49.5127	1.33815
												26.5	1.11281	31.3218	19.4415	0.65	0.3329	59.0185	0.245858	0.48	2	54.7885	0.408513	5010	0.819196	52.7938	0.865758
												25.85	1.00074	33.4232	17.7302	0.6	0.169208	56.6055	0.22494	0.44	2.45801	48.1503	0.0884694	4995	6.27093	32.474	4.00899
												25.8	1.1878	29.226	21.0088	0.55	0.383789	55.2125	0.287252	0.4	1	18.4713	0	4960	7.39532	28.8179	3.01156
												25.7	1.17083	30.8051	20.0107	0.5	0.399751	55.4439	0.273064	0.38	0.175616	49.6189	0.254169	4945	2.2497	47.1119	1.9427
												25.45	1.28107	32.7276	19.0988	0.4	0.23062	55.474	0.271303	0.35	1.93153	47.7105	0.0716725	4930	3.78245	43.5286	1.86507
												25.35	1.01668	30.3266	19.7039	0.35	0.220598	54.992	0.321704	0.3	1.2	22.4763	0	4900	2.51129	48.386	0.56119
												25.25	1.01518	31.9922	18.6943	0.3	0.286351	54.543	0.287784	0.25	0.6	56.5017	0.217068	4875	1.4922	51.4924	0.48522
												25.05	1.1996	29.0649	20.1638	0.25	0.409609	54.8229	0.314092	0.2	0.0140813	51.7184	0.103612	4850	1.22361	52.2828	0.494078
												24.65	1.14054	30.9332	19.0762	0.2	0.311316	53.8387	0.411586	0.15	0.4	56.3599	0.336864	4820	1.93065	52.476	0.183384
												24.15	1.24983	29.403	20.1726	0.15	0.588147	53.5974	0.470757	0.1	0.8	54.7083	0.399129	4790	0.711774	53.4436	0.337694
												23.85	1.14519	30.6104	19.1114	0.1	0.932456	51.6026	0.607293	0.01	1.25125	53.5743	0.169188	4780	0.531819	54.0913	0.314825
												23.45	1.27239	29.5136	19.9105	0.05	1.36906	41.1736	0.159802					4750	0.55043	60.8257	0.115337
												22.3	1.19371	30.9483	19.1198	0	1.15557	51.6454	0.175454					4720	0.579133	53.6482	0.332362
												22.3	1.2668	29.3449	19.9929									4690	1.03924	52.407	0.437661
												21.3	1.13085	31.2323	19.796									4660	5.86542	24.9519	1.72054
												20.3	1.38065	31.8657	20.526									4635	0.721718	53.3012	0.527002
												18.85	1.24977	31.8275	19.7065									4620	0.37564	54.1503	0.185997
												17.85	1.1743	29.5354	21.0076									4580	0.773709	52.8415	0.385174
												17.1	0.944472	28.3964	19.774									4555	0.548337	53.0573	0.435792
												16.75	1.16162	29.2673	20.6362									4540	1.11407	64.1482	0.898541
												16.15	1.15765	29.7364	19.6634									4530	0.565384	53.2518	0.469801
												15.25	1.80839	28.7911	19.1557									4510	1.66536	48.7561	1.93704
												14.15	1.58337	28.1085	20.6433									4490	0.430324	54.3666	0.8011
												14	1.3496	28.5034	20.1685									4480	1.66067	49.1373	2.65429
												13.55	1.12692	30.6408	19.2132									4320	1.5177	38.5097	9.5868
												13.2	1.17403	28.8055	19.5293									4295	1.23464	46.7155	7.38784
												12.85	1.26868	29.9972	20.0601									4275	0.883214	51.9674	1.75687
												12.6	1.05445	29.0366	20.2161									4245	1.10813	50.272	4.27128
												10.85	1.22638	27.1967	19.3742									4220	1.3036	50.3891	2.48425
												10.2	1.11801	28.2495	20.016									4180	0.222915	54.3392	0.684355
												10.05	1.28029	29.4876	20.6354									4140	0.528866	53.3124	0.267424
												9.5	1.46489	28.288	20.32									4100	0.679186	52.9829	0.950487
												9.15	1.39771	28.0053	19.7795									4060	0.495244	52.9811	2.30689
												8.95	1.54057	30.819	18.8216									4020	0.273251	53.8977	0.860459
												8.8	1.45637	29.5776	19.7161									4010	0.434704	53.4306	1.14351
												8.45	1.35166	27.6088	19.5889									3970	1.55144	44.7083	10.9913
												8.2	2.41283	26.5132	20.0917									3940	0.867602	50.6074	3.49761
												7.8	2.12529	26.7371	20.9988									3890	0.82851	51.0875	3.59347
												6.4	1.29247	26.1438	21.7729									3850	1.00264	50.1695	5.57566
												5.6	1.24063	28.0663	20.6579									3810	0.748872	50.5031	6.22536
												4.1	1.41846	28.1023	21.2035									3770	1.56335	45.6855	8.29505
												2.8	1.27379	29.3097	20.1338									3750	2.52464	39.4562	12.1556
												1.65	1.55457	28.3829	21.1526									3730	2.08809	28.1498	16.6806
												1.45	1.30536	28.1184	21.3965									3700	2.77636	38.3486	13.5371
																								3660	1.75785	44.6014	8.4897
																								3635	2.31877	39.8305	14.3638
																								3610	1.94269	42.1115	15.2754
																								3560	2.47116	38.4471	19.6965
																								3535	2.31518	38.2096	18.9372
																								3485	1.58216	40.5464	17.253
																								3470	2.56223	47.5012	2.67778
																								3450	0.806227	50.0797	4.74841
																								3430	0.796646	52.59	1.81217
																								3400	1.04239	49.3149	5.57296
																								3380	1.17677	45.6307	4.13262
																								3360	0.897346	51.5705	1.31149
																								3350	2.85983	40.1991	15.6584
																								3330	1.72077	42.3042	14.9739
																								3310	2.35774	44.201	11.0572
																								3300	1.53948	41.6794	14.7497
																								3290	1.50315	48.1245	4.68159
																								3220	1.79388	36.7244	9.32681
																								3200	0.467	52.6897	1.39964
																								3180	0.618763	52.2524	1.35502
																								3160	1.53944	37.2762	12.6936
																								3085	0.20082	54.6367	0.316841
																								3075	0.30607	54.3741	0.216891
																								3050	0.1344	55.1916	0.278081
																								3040	0.116501	55.4139	0.271798
																								3025	0.114874	54.9386	0.570049
																								3010	0.0699659	54.8783	0.450595
																								2990	0.118779	55.0495	0.367177
																								2980	0.122034	55.2153	0.287139
																								2940	0.203389	54.257	0.284413
																								2910	0.0976268	55.2382	0.29429
																								2850	0.0260338	54.8296	0.826578
																								2820	0.18484	54.2423	0.445077
																								2800	0.870424	52.3908	0.652275
																								2790	0.053989	0.383273	0.080454
																								2775	0.139281	52.2881	0.34383
																								2750	0.10739	53.9703	1.90144
																								2730	0.11162	55.1576	0.403696
																								2705	0.0878641	55.0293	0.305782
																								2680	0.103622	57.9394	0.404298
																								2660	0.0768711	58.295	0.745391
																								2640	0.0279264	58.6835	1.39894
																								2610	0.0352755	58.3279	1.08814
																								2580	0.0271915	58.1453	0.727022
																								2560	0.0364513	57.7611	0.587399
																								2530	0.0460051	57.2387	0.807094
																								2460	0.0246928	59.2015	3.09352
																								2440	0.0249868	57.3798	1.59735
																								2410	0.0908343	58.1203	2.2556
																								2380	0.758328	56.6324	0.386904
																								2320	0.428739	52.6196	0.125887
																								2280	0.448582	55.7574	1.82618
																								2260	0.054089	57.8911	0.884117
																								2235	0.417132	48.3296	0.446951
																								2220	0.192986	57.6067	2.1697
																								2200	0.133753	57.9988	0.889941
																								2180	0.212351	0.14691	0.0159461
																								2175	4.8489	0.555827	1.37566
																								2170	0.0959786	57.6368	0.573047
																								2150	0.105532	56.5524	0.426921
																								2130	0.204304	59.0022	0.774207
																								2110	0.0526192	57.6083	1.45738
																								2090	0.0213123	58.68	0.726395
																								2060	0.0742254	58.6455	0.750344
																								2040	0.0521783	57.5624	0.668402
																								2015	0.287054	57.0555	1.08253
																								1990	0.441005	49.1582	1.67051
																								1965	0.39582	48.2879	0.29492
																								1940	0.428568	50.4232	1.53166
																								1925	0.245899	55.629	0.947451
																								1900	0.154036	57.1632	0.74743
																								1860	0.276324	59.1103	1.0924
																								1850	0.159915	50.0678	0.62567
																								1835	0.123464	57.7629	1.24703
																								1815	0.0658475	57.2074	0.994917
																								1770	0.442238	57.899	0.684994
																								1740	0.816948	57.6307	0.642795
																								1710	0.963961	42.8177	8.30891
																								1680	0.300576	57.9502	5.21157
																								1650	0.212829	58.1156	4.47251
																								1610	0.147422	56.9629	0.846404
																								1580	0.0347219	54.0463	0.6188
																								1550	0.0352755	59.5784	1.07595
																								1530	0.0330197	54.9489	0.408238
																								1500	0.248202	57.3239	0.527992
																								1470	0.110971	53.0675	0.527852
																								1440	0.121994	57.9864	0.612959
																								1420	0.0992122	54.4203	0.274884
																								1400	0.0382151	56.9612	0.780918
																								1385	0.0349815	48.3691	4.15051
																								1370	0.0687871	57.7817	1.34903
																								1320	0.443251	57.1542	0.458838
																								1290	0.611948	55.9171	0.591988
																								1250	0.360838	48.8147	0.43795
																								1240	0.187107	56.3034	2.00839
																								1210	0.183726	57.1987	1.64163
																								1190	0.256188	51.245	1.36558
																								1160	0.323064	57.664	1.13747
																								1140	0.265007	52.7055	0.513266
																								1110	0.133459	56.5556	0.738444
																								1090	0.401898	56.2165	0.338653
																								1070	0.695452	56.54	1.83071
																								1045	0.510364	57.6766	0.598606
																								1030	0.189312	59.0467	0.845242
																								1010	0.108472	57.5629	0.439502
																								990	0.0455641	58.0799	1.41989
																								960	0.123905	59.1629	0.774066
																								940	0.0565877	56.7367	0.820285
																								920	0.0731966	54.4591	0.395379
																								900	0.0636428	56.9588	0.436585
																								880	0.0668764	56.3066	13.5841
																								865	0.0889235	56.4688	0.92453
																								850	0.0830443	58.8165	0.607553
																								840	0.172474	54.8132	0.509155
																								820	0.14644	54.7781	0.711236
																								790	0.109993	55.1103	0.537632
																								760	0.109017	50.4613	7.66222
																								720	0.397992	50.203	0.870352
																								710	0.252203	51.8468	0.719788
																								680	0.346575	44.7074	1.41759
																								620	0.40448	53.9055	0.486766
																								610	0.260338	54.3496	0.386408
																								570	0.136027	54.2693	0.473154
																								550	0.151322	54.9052	0.371984
																								530	0.214779	46.8339	13.0379
																								520	0.191999	49.0342	9.86794
																								500	0.178983	53.7212	2.35475
																								470	0.119756	46.0094	14.8502
																								440	0.160433	52.1625	4.62916
																								420	0.228772	49.9925	7.88391
																								400	0.215755	49.5708	7.64692
																								70	0.784885	50.1221	5.15032
																								62	0.705596	45.3492	4.85897
																								50	1.13977	55.163	7.45925
																								45	0.785869	48.9629	6.84395
																								28	0.854799	47.2326	8.52569
																								23	0.848969	47.6882	7.39525
																								19	0.553995	50.1586	5.16704
																								12	0.571504	55.1378	4.83362
																								4	0.921167	49.0811	6.21033
																								-5	0.171823	54.8432	0.645236
																								-13	0.366101	53.2471	2.23614
																								-500	0.216469	54.7267	0.587824
																								-520	0.224702	54.8259	0.764937
																								-560	0.175065	54.9208	0.778873
																								-580	0.151381	55.1346	0.627213
																								-620	0.3977	53.461	0.909192
																								-720	0.749863	53.0923	0.782301
																								-745	0.608758	53.4571	0.579872
																								-770	0.0220472	55.0475	0.94542
																								-790	0.0129343	56.2893	0.510621
																								-820	0.0183012	55.3749	0.48271
																								-850	0.046299	55.5863	0.794927
																								-880	0.0180787	56.1372	0.646093
																								-900	0.0477688	56.0913	0.386148
																								-940	0.308457	52.9812	2.33955
																								-990	0.0485037	55.3186	0.331593
																								-1010	0.0404198	55.8818	0.496661
																								-1035	0.0161679	55.5015	1.17528
																								-1055	0.0482098	51.8131	3.8095
																								-1070	0.0608477	56.0941	1.0276
																								-1090	0.0153205	54.9487	0.66018
																								-1110	0.0430655	55.095	0.721159
																								-1140	0.0595273	56.0725	0.45801
																								-1170	0.42521	47.2477	6.98389
																								-1190	0.0680915	38.7071	14.9155
																								-1220	0.110971	55.2121	0.807587
																								-1240	0.054383	55.3941	0.42993
																								-1290	0.427557	54.6081	0.306908
																								-1310	0.892945	53.133	0.494915
																								-1345	1.45327	54.6219	0.343488
																								-1360	0.33586	54.2575	0.411911
																								-1375	1.84782	51.7073	1.01342
																								-1385	0.61209	54.0989	0.473627
																								-1400	0.618589	54.5916	0.171402
																								-1425	0.257502	54.9648	0.255244
																								-1450	0.355496	54.5044	0.342164
																								-1460	0.104941	56.4924	0.653937
																								-1490	0.126257	56.0588	0.54823
																								-1500	0.193207	58.2413	0.597931
																								-1530	0.124287	58.5066	0.469394
																								-1550	0.146557	58.5996	0.448636
																								-1565	0.215686	55.6474	5.07197
																								-1590	0.278695	56.0149	0.536362
																								-1610	0.0932662	58.5849	0.683502
																								-1630	0.113263	58.4298	0.685229
																								-1650	0.0982473	56.5197	0.530731
																								-1670	0.0537317	55.7166	0.573654
																								-1680	0.53589	55.6704	0.391624
																								-1700	0.1665	56.4842	0.347688
																								-1720	0.0984052	57.8642	0.513806
																								-1740	0.186446	55.9347	0.442001
																								-1750	0.511723	55.2879	0.208272
																								-1770	0.465331	55.8906	0.351258
																								-1800	0.259046	55.8118	0.446617
																								-1820	0.430653	56.9334	0.15186
																								-1850	0.370357	55.1964	5.18718
																								-1870	0.0384381	54.1241	2.40591
																								-1890	0.194337	57.0835	0.534663
																								-1900	0.210489	59.0865	0.863383
																								-1940	0.108092	57.4	0.671958
																								-1960	0.0364513	56.1508	0.668671
																								-1980	0.100539	58.1584	0.47246
																								-2000	0.17604	55.4252	0.227614
																								-2120	0.690483	55.1839	0.337353
																								-2140	1.18862	53.4186	0.344957
																								-2150	0.401612	55.3758	0.232001
																								-2175	0.212991	54.7808	0.341369
																								-2200	0.773307	55.2511	0.0680159

## Sheet: Deep shelf to slope
Guryul Ravine				Kamura				Meishan				Tulong				Yangou				Daxiakou				Selong				Spiti				Ursula Creek
Sample (cm)	Al2O3 (wt%)	CaO (wt%)	MgO (wt%)	Sample (cm)	Al2O3 (wt%)	CaO (wt%)	MgO (wt%)	Sample (m)	Al2O3 (wt%)	CaO (wt%)	MgO (wt%)	Sample (m)	Al2O3 (wt%)	CaO (wt%)	MgO (wt%)	Sample (m)	Al2O3 (wt%)	CaO (wt%)	MgO (wt%)	Sample (cm)	Al2O3 (wt%)	CaO (wt%)	MgO (wt%)	Sample (m)	Al2O3 (wt%)	CaO (wt%)	MgO (wt%)	Sample (m)	Al2O3 (wt%)	CaO (wt%)	MgO (wt%)	Sample (m)	Al (wt%)	Ca (wt%)	Mg (wt%)
1100	4.24619	25.6552	1.26937	2905	0.401984	53.6891	0.601299	13	7.22	32.83	1.53	26.9	1.37642	50.813	0.496132	10	1.06	51.46	0.84	6625	1.20817	51.4652	0.424273	6.55	1.3558	54.2355	0.866926	16.0184	7.08261	52.458	1.19583	105.5	3.45374	9.94983	0.964
843	18.7798	0.34728	1.67305	2855	0.226795	54.3275	0.448047	12.7	14.7	6.48	3.83	26	2.17797	48.288	0.879346	9.1	1.56	48.77	1.69	6590	1.34533	51.2001	0.35327	6.2	0.366444	54.6075	0.698915	15.7216	5.2073	40.835	0.980357	104.5	3.72496	11.85	1.907
503	20.5916	0.332865	0.769198	2825	0.0727759	54.8427	0.42014	12.4	15.03	5.9	3.32	25.7	1.52156	50.5758	0.510784	8.8	14.18	12.48	2.84	6555	0.919628	53.3815	0.160593	6	1.43777	50.5116	0.745308	15.1747	3.30614	38.5575	1.4407	101.5	3.99411	8.532	0.8576
275	18.8474	0.332417	0.292872	2775	0.0964624	54.6012	0.401029	12	15.47	5.17	3.04	25.3	2.26333	47.6665	0.554966	7.35	3.5	42.04	2.23	6520	0.985784	52.2214	0.317021	5.8	0.931982	53.5072	0.274812	14.9637	4.93074	36.5234	1.8571	99.5	1.31386	17.11	7.458
215	20.0474	1.1741	0.862267	2725	0.107905	54.6503	0.406813	11.7	14.02	6.46	3.25	24	1.47132	49.6563	0.891545	6.6	6.16	20.58	11.79	6485	1.26094	52.0643	0.402961	5.6	2.20516	52.4402	0.322417	14.7528	2.20568	39.6438	0.905412	98.5	2.883	5.333	1.116
80	19.2161	0.779126	0.548336	2685	0.102168	54.3528	0.711815	11.45	13.76	6.72	3.06	23.8	1.30664	50.4333	0.528707	5.8	2.96	25.45	14.59	6450	1.67325	50.7362	0.370866	5.4	0.14686	48.7586	0.228774	14.3387	4.26293	37.751	1.82252	97.5	2.42595	12.9871	2.058
40	18.71	4.29805	0.749917	2655	0.0700296	54.4952	0.380241	11.2	13.4	8.53	3.92	23.3	0.9874	51.4428	0.5159	5.4	6.86	21.26	13.09	6415	4.46219	40.7911	0.808511	5.2	0.395656	48.1315	0.271236	13.9637	1.7846	40.2774	0.59666	96.5	2.92407	13.005	2.168
20	1.55754	33.7254	1.06189	2625	0.0783828	54.6784	0.379034	10.85	14.31	7.23	3.79	22.3	2.00142	48.8367	0.568925	5.05	5.09	21.91	13.38	6380	1.13069	52.085	0.471214	5	0.677717	42.9746	0.598343	13.5653	3.74601	42.6227	0.709999	95.5	3.08913	12.72	1.944
12	18.0375	0.699004	0.39588	2595	0.125527	54.7642	0.40635	10.7	13.88	8.66	4.12	22.2	1.92311	48.5671	0.650254	4.65	5.89	20.91	13.64	6345	1.15771	52.061	0.579861	4.8	2.57582	37.6846	1.33206	13.495	2.16185	52.7161	0.630717	94.5	3.55368	8.74215	2.349
8	3.24151	23.7724	0.258232	2545	0.0456566	54.8463	0.368814	9.9	11.89	12.25	5.08	21.22	0.871681	51.4568	0.543894	4.2	4.24	25.24	14.83	6310	2.06829	46.5874	2.78694	4.6	5.62951	36.7042	0.685437	13.1981	4.08665	46.1357	0.624165	93.5	2.772	9.427	1.772
4	19.8631	0.4055	0.52646	2515	0.182054	54.6668	0.461219	9.45	12.89	10.95	3.38	21.2	1.3807	50.2649	0.505679	4	2.7	25.56	16.32	6275	5.42288	37.7964	8.28193	4.4	3.2864	38.4843	0.346108	13.0887	0.570801	51.041	0.308734	92.5	3.85437	11.37	2.725
-2	1.32219	23.2632	0.904087	2485	0.0469153	54.3701	0.391098	8.9	9.85	19.75	3.58	19.4	0.739697	52.4914	0.414682	3.65	2.5	26.27	15.76	6240	4.00301	37.9582	4.18236	4.2	3.33352	40.178	0.416692	12.9169	2.53306	39.8829	0.977442	91.6	1.47329	25.04	1.469
-6	1.21122	35.137	1.6933	2455	0.105273	54.5001	0.446041	8.65	13.63	7.99	4.43	19	1.60679	49.7929	0.569372	3.25	5.72	22.4	15.29	6205	1.3822	51.5797	0.479314	2	3.86352	33.9483	0.339101	12.4403	0.624713	52.7127	0.333434	91.5	1.17	13.55	6.3615
-10	0.562921	32.2611	0.609154	2425	0.107562	54.6037	0.47884	8.05	13.25	8.51	4.46	18.42	1.1317	50.0243	0.686844	2.45	3.2	25.52	16.63	6170	1.4302	50.4866	0.497853	1.8	2.40522	44.1226	0.638581	12.2762	1.90008	49.4106	0.448741	90.5	2.94189	10.78	2.169
-20	5.40358	14.8884	0.560606	2395	0.217412	54.1145	0.523126	7.95	13.53	7.97	4.53	18.02	2.6161	45.7727	0.5836	2.4	1.72	29.26	17.22	6135	0.607645	54.6629	0.0605334	1.6	2.0131	45.4064	0.592262	12.0028	2.72642	47.1408	0.74172	89.5	3.03318	9.984	2.62915
-32	2.09672	23.1531	1.05266	2365	0.288815	53.9557	0.492837	7.6	12.71	9.61	4.72	16.4	5.76	25.56	1.38	2.2	0.89	32.68	16.19	6100	2.36852	46.7651	2.08772	1.4	1.79593	44.9922	0.612729	11.7684	1.97168	47.4828	0.407809	88.6	0.896406	35.978	1.139
-265	14.9929	0.631229	0.910692	2325	0.271193	54.3344	0.43876	7	14.63	6.15	3.62	15.3	11.5352	12.9639	1.4163	1.75	7.44	21.13	13.84	6065	0.839906	53.1963	0.225585	1.2	1.84409	44.6104	0.561785	11.5497	3.57863	42.6872	1.03016	88.5	2.98345	7.60117	1.978
-500	16.6724	0.282502	0.503898	2295	0.163059	54.0705	0.384348	6.6	12.71	8.81	4.71	14.95	5.02	36.76	1.67	1.65	6.07	22.2	14.35	6030	1.89007	49.5043	0.519478	1	4.98775	36.0133	0.663294	11.4872	1.1906	52.7292	0.348933	87.5	3.15665	11.29	2.595
-780	17.5985	0.340996	0.309502	2260	0.13388	54.69	0.369217	5.7	12	11.87	4.6	14.85	7.74	30.37	1.48	1.55	4.02	23.81	14.63	5995	0.984744	52.8051	0.379039	0.9	3.17414	38.9134	0.700077	11.2997	4.55126	42.3336	0.823724	86.5	2.386	10.92	2.165
				2230	0.0894823	54.6503	0.378282	5.35	14.56	3.66	2.67	14.75	5.06	36.71	1.23	1.45	3.11	24.61	15.14	5960	1.2023	52.0623	0.491694	0.8	0.625108	49.2606	0.645526	11.2059	1.68315	50.8639	0.316473	85.5	3.17762	15.21	1.26123
				2180	0.11683	56.1556	0.404217	4.5	7.22	29.48	2.21	14.74	4.7	37.45	1.3	1.25	2.74	28.39	15.7	5925	2.79249	45.5169	1.86527	0.7	0.965627	48.61	0.732597	10.8387	2.05344	43.1554	0.800196	84.5	1.73912	24.0184	0.87
				2110	0.106875	54.2496	0.377067	3.3	9.1	13.47	6.64	14.73	5.11	37.18	1.34	1.1	2.08	30.63	15.43	5890	1.45912	51.1304	0.605383	0.6	4.58552	39.8279	0.904982	10.7294	0.976311	53.3481	0.809147	83.6	1.77047	26.9024	1.278
				2030	0.255745	55.5186	0.537385	3	22.94	1.21	2.93	14.71	4.98	36.37	1.88	0.95	1.8	31.83	15.82	5855	1.45723	51.1147	0.341194	0.5	2.8359	40.3449	0.610092	10.4872	2.93992	47.4114	0.585409	83.5	1.66564	22.6665	6.09
				1970	0.324402	53.7722	0.524925	2.75	14.7	3.6	2.63	14.7	3.9417	38.401	1.0442	0.75	3.56	26.49	15.48	5820	1.23363	51.9625	0.306961	0.4	1.21609	47.2628	0.552493	10.2528	0.36577	54.9451	0.144587	81.6	1.40893	25.3703	1.222
				1930	0.623058	53.6088	0.596166	2.3	12.71	8.01	4.43	14.55	1.28326	44.6604	3.23175	0.65	2.48	31.02	15.7	5785	1.06722	52.1959	0.321559	0.3	1.62824	43.0969	0.531551	9.96375	3.95278	42.2399	0.858591	80.5	1.024	17.7	5.294
				1890	0.401068	53.8444	0.528696	2.05	9.48	14.17	7.11	14	0.630999	51.0091	0.568302	0.05	2.35	33.75	13.34	5750	1.41936	51.282	0.448101	0.2	0.972124	48.3418	0.712706	9.79187	1.07087	56.1349	0.626918	79.5	2.589	10.68	3.127
				1860	0.231372	54.3495	0.497822	1.8	4.54	25.45	8.51	13.6	0.870717	51.0506	0.452026	0.04	4.96	30.87	13.95	5715	0.525641	56.279	0.210398	0.12	1.16545	54.1872	0.999635	9.50281	0.283634	53.5882	0.142717	76.5	2.071	11.46	2.414
				1810	0.128845	55.1101	0.432822	1.65	15.24	4.42	2.42	13.1	0.458017	52.7269	0.448983	0.03	3.61	32.39	11.32	5680	3.79997	40.8003	3.01903	0.1	1.18305	47.0813	0.648304	9.41687	0.0696654	56.0714	0.316434	75.5	3.76522	12.99	3.09808
				1760	0.285153	54.1844	0.568668	1.3	4.5	27.19	5.68	12.6	0.463531	52.1927	0.431995	0.02	0.86	48.66	4.58	5610	0.399806	54.3835	0.117674	0.0934783	5.99165	39.8073	0.781944	9.26062	3.90517	41.5366	0.848077	70.7	1.60552	26.64	0.5761
				1710	0.352894	54.6759	0.460186	1.1	23.39	1.04	2.63	12.1	0.3379	50.9612	0.5308	0.01	0.46	51.27	3.02	5575	0.76518	53.4276	0.0473042	0.0869565	3.35174	40.6722	1.26627	9.15906	3.75945	44.0587	0.708664	51.55	1.68508	0.553118	0.503039
				1660	0.338362	54.1901	0.452482	0.9	22.27	2.68	2.83	12	0.3145	52.9501	0.4009	-0.2	0.16	54.96	0.59	5540	0.966093	52.7849	0.167209	0.0804348	1.46969	45.0408	2.30673	8.96375	3.41674	42.695	0.892539	44	3.74278	0.514886	0.338
				1630	0.245905	55.6961	0.460729	0.75	2.75	45.47	1.17	11.6	0.3626	52.3775	0.2667	-0.3	0	55.47	0.45	5505	1.00144	52.5882	0.134278	0.073913	1.11538	37.8964	9.3982	8.87	1.04056	54.079	0.55365	43.5	3.14821	15.64	6.256
				1590	1.02104	52.299	0.738245	0.55	10.75	12.27	6.4	11.3	0.443858	52.3876	0.311383	-0.4	0.45	54.52	0.61	5470	1.48431	50.8461	0.371267	0.0673913	0.730488	35.3826	10.7417	8.83094	4.30186	42.0339	0.765142	43	3.407	5.931	2.636
				1540	0.434138	53.8535	0.548839	0.3	5.77	22.66	9.28	9.8	2.6	45.37	0.92	-0.5	0.01	55.23	0.57	5435	1.66774	48.6034	1.28675	0.0608696	0.560679	35.3556	11.1015	8.64344	0.91132	55.0534	0.612	41.5	3.556	5.55	1.972
				1510	0.683246	53.7474	0.51237	0.18	4.76	28.8	5.23	8.8	2.47	46.01	0.98	-0.6	0	55.5	0.47	5400	0.344342	54.4949	0.138752	0.0543478	0.27325	32.8056	12.1823	8.52082	5.18828	37.827	0.901161	36	0.0233345	0.0714178	0.0233345
				1470	0.308039	53.8561	0.64066	0.1	5.67	23.75	6.95	8.1	2.89	43.44	0.96	-0.8	0.04	55.5	0.34	5365	0.458067	54.4742	0.0971808	0.0478261	1.06929	34.0036	13.0366	8.37172	2.54111	52.9236	0.710185	35	1.80477	24.9287	0.6439
				1420	0.744236	52.823	0.787632	0.05	4.98	25.55	7.09	7.47	3.04	40.67	2.17					5330	3.02374	41.5322	4.13924	0.0413043	1.19362	33.8631	13.2044	8.15578	3.50192	42.8063	0.92489	33.5	1.365	19.49	0.5172
				1400	0.37372	53.8561	0.64884	0	15.79	5.2	2.46	7.25	2.86	41.39	1.66					5225	1.71063	48.5529	1.36217	0.0347826	1.2333	31.0564	13.3769	8.04267	4.22688	41.5887	1.01708	32.5	3.984	3.049	1.256
				1390	0.74641	53.3022	1.09999	-0.05	11.17	10.77	5.82	6.3	3.55	42.21	0.85					5190	1.73664	48.4313	1.74281	0.0282609	1.49052	30.0255	13.0065	7.94242	2.16699	51.1581	0.635994	27.5	2.88635	6.48783	2.97279
				1340	0.365367	53.4723	1.38792	-0.75	0.51	48.88	0.99	2.8	3.52	24.55	9.48					5155	2.55587	45.7675	1.63941	0.0217391	1.08855	28.8116	13.0862	7.83959	2.41645	45.1295	0.667758	25	1.76	9.548	3.342
				1310	0.231372	53.536	1.55332	-1.3	0.21	51.48	1.06	1.85	4.57	25.74	10.24					5120	2.62712	44.9993	1.75822	0.0152174	2.18268	29.0455	12.6629	7.69306	4.11276	42.9007	0.897753	18	2.62093	13.8793	3.37
				1260	0.13529	49.2552	4.25172	-2.01	1.75	29.24	0.52	1.5	3.56	26.83	11.77					5050	3.07936	43.8716	1.37496	0.00869565	1.37486	26.8665	12.4665	7.59794	3.1845	44.142	0.880789	14.5	3.68182	8.375	2.052
				1210	0.156994	55.1924	1.35001	-4.3	1.19	44.8	1.71	1	3.35	27.45	12.38					5015	2.70753	44.2337	2.45538	0.00217391	1.18732	26.2388	12.341	7.32288	4.99202	41.119	0.936668	13	3.8525	9.196	2.006
				1160	0.099173	36.7906	16.3431					0.65	3.04	26.72	12.93					4980	1.2919	49.4986	1.71069	-0.00434783	1.34956	25.4718	11.9283	7.14807	1.36432	52.679	0.802702	8	3.98754	6.823	2.149
				1110	0.0925718	55.6015	0.441659					0.35	2.66	27.78	12.32					4945	1.6953	49.101	1.05023	-0.0108696	1.49846	27.2179	11.9073	7.01954	2.61425	48.5333	0.772857	6.6	2.90063	12.51	2.889
				1060	0.524001	42.5746	10.816					0.1	1.62	30.12	14.66					4910	0.869612	51.6057	1.21026	-0.0173913	1.82619	29.3661	12.8299	6.85244	0.629614	55.1073	0.50846	6.5	3.066	6.591	2.362
				1010	0.159635	36.01	17.0068													4875	6.76195	34.0224	1.48068	-0.023913	1.30458	29.833	12.1424	6.74447	3.66345	41.1991	0.842656	5.88	2.08	12.03	2.798
				960	0.503448	41.2913	10.0282													4770	4.69256	40.7141	0.459281	-0.0304348	1.42107	25.7084	11.4866	6.64422	3.56858	43.4394	0.929013	4.5	3.46321	6.991	3.13808
				930	0.476609	44.7954	8.76943													4735	5.8385	37.9046	0.686748	-0.0369565	1.47865	24.008	11.2624	6.55938	4.78916	44.2836	1.48068	4.26	2.35932	11.0674	3.763
				880	0.702193	38.0817	13.7664													4700	0.845361	52.0481	0.936772	-0.0434783	2.79374	26.3354	10.2461	6.41028	3.44883	40.4696	2.1288	4.25	2.615	7.043	2.261
				850	0.264785	53.5394	1.6531													4665	1.87412	48.9794	0.899947	-0.05	1.2261	39.3183	6.68585	6.28432	3.92187	42.616	0.818544	2.8	1.87433	10.5942	4.4305
				820	0.323029	53.3788	1.50011													4630	2.51684	46.0547	0.986514	-0.1	1.71536	41.8845	3.93371	6.07352	2.64603	45.2202	0.707661	2.7	1.34228	14.68	5.73167
				790	0.543759	51.9627	3.00244													4570	1.25971	49.0846	1.83104	-0.12	1.8145	36.3252	7.12691	5.93985	1.31757	54.5366	0.385649	1.3	1.46391	14.24	5.285
				760	0.237456	49.5911	4.39612													4545	1.77351	46.9967	2.60018	-0.2	4.8103	33.7851	2.20196	5.77532	5.02533	41.0006	0.726541	1.2	1.75459	14.33	6.53508
				730	0.21401	49.3605	4.92448													4520	3.46079	39.0037	2.64733	-0.3	2.11932	41.1653	3.02214	5.69487	6.53065	36.6949	1.85917	1.1	1.22008	16.2	5.802
				700	0.0343214	41.5413	11.6756													4495	6.20356	30.9451	2.81058	-0.7	1.64818	48.7308	0.768685	5.62527	6.25232	37.2604	1.41742	1	1.49181	12.05	5.5172
				670	0.0347205	48.7225	6.8074													4470	4.94581	35.8972	2.44739	-0.9	2.67466	45.0405	0.846408	5.58315	5.29428	41.6866	1.05007	0.1	3.31139	2.542	0.614782
				640	0.059159	55.4158	1.50756													4445	4.83568	36.2066	1.97535	-1.1	6.47256	30.2637	0.58524	5.54103	4.2881	42.3859	1.1243
				610	0.174999	49.4977	4.90482													4395	6.03022	33.8183	1.79018	-1.5	4.0183	38.7746	0.604846	5.49524	4.81233	41.9116	1.03419
				580	0.0362735	54.4474	0.985513													4270	3.62134	41.9337	1.82177	-2	2.18533	42.8492	0.573358	5.44945	4.84666	40.8425	0.997967
				530	0.0487461	54.7277	0.550242													4245	7.38346	33.2078	1.8216	-2.5	4.40416	35.8097	0.521429	5.33956	4.81386	41.0961	1.29567
				480	0.0292331	36.0091	16.5753													4195	4.6079	38.4945	2.30746	-3.2	1.06092	43.8996	0.539056	5.237	6.57211	35.4601	1.16323
				450	0.121422	35.2744	16.7457													4170	2.94697	43.7098	2.32926	-3.7	1.58016	41.876	0.543381	5.11978	7.12586	32.719	2.87738
				420	0.385621	42.5351	9.67803													4120	3.95662	40.619	2.59229	-4	2.57221	37.1101	0.627882	4.96044	3.59466	43.8045	0.656961
				400	0.288633	50.891	3.8373													4095	7.29874	29.2589	2.86077	-4.3	1.84765	37.5525	0.559101	4.83773	3.0383	46.5693	0.627049
				340	0.106052	52.3784	3.79832													4045	5.74669	33.8094	2.93497	-4.6	2.34317	35.0558	0.580552	4.72601	3.11936	48.3185	0.390932
				320	0.102927	51.2559	5.28725													3995	6.84135	32.2668	1.93528	-5	3.56895	39.1245	1.38561	4.62711	5.27482	36.1707	6.23439
				290	0	56.7223	0.179527													3945	4.04867	36.9725	3.76198	-5.2	2.2557	42.2274	0.941042	4.55018	5.12298	36.4585	9.42532
				260	0.104749	55.9473	0.964376													3920	5.13525	36.5456	2.80836	-5.5	2.41032	39.3562	0.924395	4.45861	4.74421	37.7852	8.20306
				240	0.0115758	57.2855	0.162627													3870	5.71516	31.6782	3.15812	-6.1	0.129046	40.801	0.399585	4.25111	2.0561	46.7053	0.868874
				220	0.0681615	54.9987	0.16926													3845	3.76813	41.0902	3.83506	-6.6	3.03357	33.8142	0.893445	4.11333	4.22314	0.75767	2.26199
				190	0.0553101	56.3129	0.281953													3820	4.36726	37.6546	3.87235	-7.7	5.88088	24.4834	0.970243	3.94	0.330333	25.9029	3.1318
				160	0	56.5331	0.178285													3795	6.04278	33.4263	2.78229	-7.9	6.16838	22.9117	1.3159	3.73333	1.79959	1.91634	1.00824
				140	0	56.1387	0.160138													3720	6.26012	21.6655	6.22641	-8	6.13751	26.9393	1.10771	2.75556	6.24362	35.0128	1.8126
				120	0.00127119	55.8128	0.17856													3645	5.40835	29.4564	3.44462	-8.5	1.52434	42.4719	0.777053	2.25556	3.99128	40.9225	0.696938
				90	0.0458387	55.132	0.278899													3595	3.69751	35.7016	3.66919	-9	6.1885	20.3319	1.34328	2.04	0.73454	41.6565	0.539797
				70	0	55.2513	0.267576													3495	5.65983	33.8883	2.56672	-9.7	2.23031	37.7725	0.962807	1.53111	1.29876	48.7005	0.485064
				40	0.0546858	37.6629	17.0682													3445	4.4824	37.3903	3.32167	-10.2	3.26104	37.8324	1.02628	1.32222	1.89714	34.3072	0.385323
				30	0	56.3486	0.259258													3420	5.2589	35.3299	2.93166	-11	4.00699	27.2044	1.04213	1.02889	1.97261	55.9011	0.561579
				20	0.0561036	54.9794	0.366487													3370	4.16123	37.4273	3.69839	-11.5	6.6882	23.2723	1.25349	0.944444	1.8545	13.6469	5.83274
				10	0	55.25	0.417297													3320	3.90395	38.9722	4.55759	-12.4	4.08997	33.2158	1.02271	0.688889	0.790229	18.2446	4.68736
				-10	0.941107	58.9764	1.09751													3295	6.71499	21.4708	4.32615	-13	6.32998	21.138	1.70898	0.582222	7.08751	36.2886	10.5341
				-20	1.36689	52.3288	7.82754													3220	4.91426	31.8425	3.46884	-13.5	1.72139	38.5635	0.554625	0.373333	0.12687	22.7581	7.10723
				-30	0.333081	42.0839	16.2287													3170	4.27396	38.5107	3.04046	-14	0.900992	43.4027	0.577676	0.251111	3.2818	42.5284	3.57631
																				3070	5.92971	32.6244	3.35895	-32	5.11512	29.2313	1.15144	0.111111	0.626517	17.6894	7.2224
																				3020	4.93862	38.6964	3.29438	-33.5	0.240508	53.8628	0.748904	0.00888889	0.729994	25.3012	3.69528
																				2995	4.57935	36.462	3.9287	-41	1.0739	50.1114	0.775276	-0.05	4.11142	50.4726	0.661045
																				2945	5.84869	34.3233	2.68576	-58	0.48158	53.5998	0.831427
																				2870	3.87724	39.1693	3.71654
																				2795	4.89601	36.5029	3.07639
																				2770	6.22552	30.2969	3.59694
																				2720	3.30065	40.7538	3.664
																				2670	4.43455	32.6002	3.3991
																				2620	2.88344	36.9355	4.60434
																				2570	2.6464	41.4087	1.87774
																				2545	5.34289	32.7561	1.07197
																				2520	2.88992	40.2793	2.73068
																				2445	2.48561	42.1903	2.048
																				2420	3.18854	41.3021	1.55495
																				2345	2.61259	42.132	1.92727
																				2240	1.74647	46.2724	1.62531
																				2220	6.68308	31.7123	1.126
																				2200	2.6612	43.7481	3.10915
																				2180	3.73657	43.1496	1.38319
																				2160	1.92293	48.7498	1.40559
																				2140	6.59785	33.2292	1.25999
																				2120	1.64096	50.3505	1.07611
																				2080	3.22867	46.4606	0.896526
																				2040	1.91425	48.9824	1.82121
																				2020	1.9141	46.4315	1.36722
																				1980	2.29036	48.0633	1.27765
																				1940	1.06821	47.7306	1.05071
																				1920	1.20667	50.9035	0.688012
																				1880	1.63789	50.6729	1.01915
																				1820	2.27169	47.7718	1.46762
																				1780	1.14432	51.4284	0.955741
																				1760	1.52371	50.8276	0.934556
																				1740	1.24674	51.6123	0.791801
																				1700	1.3842	51.3804	0.730435
																				1680	2.32908	49.4592	0.549836
																				1660	3.00226	47.3272	0.382893
																				1600	1.67051	49.9404	1.23622
																				1560	1.0818	51.8951	0.938094
																				1540	1.59421	50.5736	0.777282
																				1520	1.48517	51.1476	0.654444
																				1500	1.42122	50.507	0.778199
																				1480	1.66861	50.3276	0.732339
																				1460	2.50002	48.708	0.553937
																				1440	3.56112	45.4849	0.418541
																				1400	2.08441	48.8529	1.44379
																				1380	1.53437	50.1054	1.38056
																				1340	1.27059	51.4071	0.59671
																				1320	1.45311	50.7217	0.730109
																				1280	1.78494	49.4251	0.46014
																				1260	1.71595	49.9917	0.540674
																				1240	2.27032	49.4515	0.560944
																				1200	2.13514	49.4337	0.364225
																				1180	1.79049	49.8791	0.421261
																				1160	1.39536	51.2118	0.707588
																				1140	1.94047	50.2086	0.552141
																				1120	2.8875	47.8838	0.583731
																				1100	1.22591	51.6176	0.687876
																				1080	1.80518	50.522	0.316116
																				1060	1.43397	51.1416	0.66461
																				1020	1.06845	51.8124	0.83482
																				980	3.57945	40.8727	1.05856
																				960	1.87214	49.8992	0.217525
																				940	1.17542	51.9559	0.279595
																				920	1.94615	50.3249	0.221662
																				900	1.4504	51.0798	0.580607
																				880	2.12124	48.9921	0.825065
																				860	1.27151	48.7536	0.631166
																				840	1.02146	51.6479	1.10401
																				820	1.79778	49.7567	0.636828
																				800	1.45361	50.7414	0.806841
																				780	1.21844	51.5628	0.686768
																				760	1.51962	49.1122	0.541998
																				740	0.965487	52.0848	0.601446
																				720	1.8324	49.0304	0.55655
																				680	1.08279	51.6517	0.668362
																				660	0.939053	52.3852	0.667883
																				640	1.24286	51.3923	0.782378
																				600	1.02549	52.0469	1.28081
																				580	1.487	50.6179	1.32918
																				560	1.28117	51.0223	1.665
																				540	1.19857	51.2604	1.6267
																				520	3.13384	39.734	2.4263
																				500	2.95536	41.2999	2.34494
																				480	2.99058	40.5781	2.20099
																				460	2.53839	41.8564	1.64324
																				440	2.4628	44.7396	1.41786
																				420	3.01552	42.9334	1.70802
																				400	3.25672	39.7541	3.02426
																				380	3.90118	37.1203	3.07072
																				360	3.54621	38.003	3.04159
																				340	5.3769	29.9478	3.40096
																				320	6.02991	19.7563	10.7332
																				300	6.02772	20.5562	12.7839
																				280	5.93506	16.9597	9.33
																				260	6.89322	23.0907	7.4312
																				200	4.55767	27.246	8.96571
																				150	5.92825	31.0965	4.51491
																				130	5.57084	23.7138	9.03514
																				110	5.16358	21.0956	9.65057
																				100	7.02578	18.2456	8.68047
																				90	2.16996	26.7271	12.3482
																				80	1.53076	26.5317	11.5257
																				30	3.09399	24.1229	11.2078
																				20	0.0862701	29.9737	12.9262
																				-180	6.17	23.9971	4.687
																				-240	5.61647	25.9309	5.77287
																				-340	3.56693	32.1187	5.05322
																				-360	4.5097	34.7161	2.74738
																				-380	2.20557	41.3719	2.99052
																				-440	2.20715	42.1704	2.86273
																				-680	1.52285	57.195	3.0209
																				-1675	3.14818	27.2864	3.32796
																				-1680	0.192937	55.5439	0.523194
																				-1695	0.248978	58.0934	0.626403
																				-1710	0.213115	55.7693	0.513146
																				-1720	0.0504068	55.0322	0.413789
																				-1790	0.160094	55.8473	0.342236
																				-1890	0.158159	51.2831	2.59571
																				-1990	0.319681	56.3738	1.77463
																				-2090	0.265682	56.6452	0.33292
																				-2170	0.053206	57.8549	0.370751
																				-2250	0.166012	55.83	0.285258
																				-2470	0.062641	54.7552	0.297844
																				-2490	0.159798	56.5325	0.216015
																				-2590	0.116761	56.6029	0.315236
																				-2670	0.159108	55.5872	0.232227
																				-2770	0.0454181	57.3854	0.4331
																				-2780	0.0425526	56.05	0.0097833
																				-2930	0.0568154	56.6455	0.550557
																				-3080	0.0432241	55.263	0.275871
																				-3230	0.0323236	56.312	0.45522
																				-3330	0.0548274	56.3012	0.133733
																				-3430	0.0184122	57.0163	0.188378
																				-3580	0.159648	57.1261	0.73532
																				-3725	0.0473271	56.7646	0.763412
																				-3730	0.105446	54.2806	0.45915
																				-3880	0.287064	55.4991	0.225994
																				-4030	0.0825999	57.0267	0.359857
																				-4135	0.029657	56.9853	0.26495
																				-4140	0.162784	54.5131	0.367955
																				-4340	0.311437	54.9789	0.461716
																				-4490	0.0418814	56.4682	0.428243
																				-4690	0.063696	55.3928	0.384531
																				-4840	0.0255249	54.4593	0.269126
																				-5060	0.0925148	57.6888	0.431407
																				-5170	0.151531	54.3514	1.07895
																				-5400	0.0817472	56.0462	0.99992
																				-5540	0.060351	48.6656	6.31301
																				-5630	0.0742625	54.0154	1.88576
																				-5790	0.0954325	54.7172	0.477127
																				-5820	0.0878075	55.0385	0.347105
																				-5890	0.0597649	55.3393	0.830612
																				-6130	0.259599	56.2162	0.504454
																				-6320	0.219554	55.3135	0.54082
																				-6460	0.046957	56.9056	0.515077
																				-6560	0.0370951	56.0173	0.246068
																				-6710	0.152542	56.6945	0.346602
																				-6810	0.0741323	56.8824	0.36826
																				-6955	0.163134	55.6951	0.749214
																				-6970	0.482055	57.4569	0.835729
																				-7080	0.0500942	56.4863	0.774673
																				-7190	0.406396	56.5915	1.05669
																				-7290	0.0920609	54.2275	1.26892
																				-7410	0.079377	54.3641	0.73925
																				-7560	0.156718	55.3408	1.15606
																				-7680	0.139928	53.0077	1.40868
																				-7770	0.0989289	51.8025	1.93897
																				-7800	0.248715	53.2871	1.27593
																				-7900	0.217218	54.4396	0.487585
																				-8020	0.156785	54.3042	1.08201
																				-8120	0.186953	55.8957	0.491735
																				-8260	0.0749027	58.1395	0.56459
																				-8370	0.180206	53.1608	1.29506
																				-8470	0.163674	54.9056	1.18508
																				-8600	0.272485	56.5637	1.26701
																				-8605	0.571263	56.3246	0.631677
																				-8690	0.152307	59.9016	1.27015
																				-8760	0.198887	49.5211	4.35497
																				-8870	0.0185396	52.6939	1.45465
																				-9010	0.189651	29.7665	0.342883
																				-9070	0.182037	3.59102	0.749393
																				-9160	0.336294	54.0262	1.25859
																				-9170	0.0497129	57.4648	0.283776
																				-9245	0.0552366	55.111	0.488221
																				-9330	0.0445984	57.0436	0.470685
																				-9440	0.0885831	57.4207	1.0977
																				-9530	0.0742625	55.7646	0.083159
																				-9625	0.113133	52.9299	1.54509
																				-9715	0.0151969	49.7711	6.52236
																				-9790	0.060351	56.2514	1.41113
																				-9880	0.106995	57.1059	0.283332
																				-9900	0.0284267	53.6998	0.38996
																				-9990	0.0722545	55.3286	0.452248
																				-10080	0.125601	55.6902	0.508466
																				-10170	0.0912567	54.8834	1.36631
																				-10235	0.0788478	54.9615	1.51505
																				-10310	0.117108	55.1589	0.672053
																				-10390	0.0251633	56.0376	0.56997
																				-10420	0.0824889	53.2421	2.08176
																				-10440	0.344819	53.9759	0.312318
																				-10470	0.0875182	56.0584	0.485876
																				-10485	0.273285	53.6621	1.35784
																				-10525	0.300867	5.45187	0.188398
																				-10575	0.0630106	54.3851	1.92828
																				-10615	0.117633	54.0313	0.982235
																				-10650	0.051145	56.0476	0.264731
																				-10670	0.0548274	52.1475	3.41497
																				-10700	0.125586	5.2365	1.75578
																				-10725	0.120702	51.6904	5.21484
																				-10755	0.14832	55.799	0.448387
																				-10780	0.155481	55.9948	0.135228
																				-10785	0.399622	55.7436	0.269733
																				-10855	0.0699516	53.5562	1.9552
																				-10895	0.0570149	56.0201	0.782741
																				-10995	0.0753449	55.6297	0.763865
																				-11065	0.295336	53.836	1.82689
																				-11175	0.120369	55.8404	1.12163
																				-11275	0.164883	54.649	1.07227
																				-11355	0.145178	55.3443	1.40436
																				-11395	0.0719833	55.1015	1.07309
																				-11525	0.270343	56.433	0.60689
																				-11580	0.169739	56.4034	0.487387
																				-11585	0.244182	56.1407	0.757179
																				-11655	0.241567	55.0101	0.6538
																				-11700	0.350751	55.4347	0.8723
																				-11795	0.23042	54.08	1.15345
																				-11880	0.525457	54.7987	0.655452
																				-12000	0.50946	54.1425	0.66402
																				-12105	0.515645	55.1605	0.900942
																				-12110	0.782135	54.5859	0.910876
																				-12145	0.672752	53.288	1.22695
																				-12170	0.502054	53.3773	1.0224
																				-12240	0.523251	54.4589	0.857707
																				-12300	0.206455	54.0739	0.455071
																				-12360	0.262166	55.8769	0.354297
																				-12445	1.01652	48.2053	1.80438
																				-12465	0.790526	52.4135	1.45006
																				-12545	1.26519	51.2578	1.25968
																				-12635	0.387522	56.3716	0.713768
																				-12680	0.643651	56.5096	1.36398
																				-12755	0.390189	56.4777	0.666073
																				-12835	0.276793	54.5344	0.529405
																				-12915	0.272672	56.3308	0.510926
																				-12985	0.0772231	57.5528	0.32429
																				-13020	0.0469042	56.2044	0.170707
																				-13085	0.178879	55.2222	0.156412
																				-13170	0.0198347	56.8883	0.189821
																				-13240	0.0229785	57.2297	0.159678
																				-13340	0.0435755	62.3788	0.283841
																				-13400	0.257569	57.7504	0.308196
																				-13500	0.326606	56.992	0.23491
																				-13570	0.161686	57.7033	0.288695
																				-13630	0.174289	56.1372	0.483522
																				-13700	0.0681251	63.7204	0.319577
																				-13760	0.0527816	56.05	0.324335
																				-13810	0.0865373	56.05	0.32042
																				-13850	0.166364	54.4454	0.132251
																				-13930	0.0271758	56.0032	0.369164
																				-13990	0.07058	58.2577	0.0543359
																				-14030	0.0695571	56.7624	0.610264
																				-14090	0.146964	54.5477	0.835663
																				-14120	0.0885831	78.711	0.333699
																				-14185	0.0466442	58.4338	0.0310925
																				-14235	0.0851477	55.3175	0.106796
																				-14305	0.0521679	56.05	0.330043
																				-14365	0.138091	56.05	0.33522
																				-14450	0.0558503	58.2668	0.386469
																				-14460	0.0998783	57.0305	0.308352
																				-14505	0.0603992	56.05	0.276899
																				-14565	0.0265765	55.2665	0.18808
																				-14600	0.124107	56.6524	0.261927
																				-14680	0.0637389	57.9454	0.39917
																				-14750	0.0494262	57.6285	0.424122
																				-14820	0.0838976	57.028	0.31894
																				-14945	0.231826	56.0586	0.248213
																				-14950	0.433186	57.0283	0.783924
																				-14980	0.227863	57.2124	0.435467
																				-15005	0.410648	55.6825	0.672307
																				-15010	0.629115	53.2957	1.23551
																				-15040	0.345127	55.2278	0.661165
																				-15075	0.3329	55.4881	0.772513
																				-15110	0.0353816	57.9982	0.535193
																				-15145	0.240207	56.1939	0.537814
																				-15195	0.692947	52.3604	1.46327
																				-15285	1.24181	50.1645	2.28753
																				-15345	1.01493	51.7854	1.83474
																				-15420	0.433651	54.197	0.776361
																				-15430	1.03539	56.5065	1.55444
																				-15500	0.342934	56.0187	0.705262
																				-15550	0.724212	56.0178	1.33062
																				-15570	0.373541	54.1504	0.770784
																				-15600	1.23326	56.3819	1.75836
																				-15710	0.36528	54.9064	0.800424
																				-15815	0.0506591	55.1649	0.520296
																				-15885	0.773127	53.0796	1.41939
																				-15890	0.514189	53.6529	0.894454
																				-15940	0.260368	56.2488	0.663769
																				-16035	0.230845	54.9469	0.50059
																				-16115	0.080508	55.2696	0.411007
																				-16200	0.123706	57.3018	0.421895
																				-16270	0.212169	57.0438	0.470049
																				-16390	0.117932	56.0446	0.472295

## Sheet: Deep basin
West Pingdingshan				South Majiashan				Shangsi
Sample (cm)	Al2O3 (wt%)	CaO (wt%)	MgO (wt%)	Sample (cm)	Al2O3 (wt%)	CaO (wt%)	MgO (wt%)	Sample (m)	Al2O3 (wt%)	CaO (wt%)	MgO (wt%)
10764	1.96929	49.0354	1.12577	9460	0.739207	42.9788	8.81479	9.8	2.95	45.28	1.11
10729	5.50208	53.6535	7.70636	9410	0.351355	52.6319	0.653709	8.9	1.88	48.6	1.04
10654	3.74578	46.711	0.803969	9380	0.507005	52.177	0.660579	8.05	2.4	46.2	1.16
10644	0.645128	53.6113	0.636774	9370	0.85191	51.6584	0.800006	6.2	2.93	44.21	1.13
10584	0.725316	53.9719	0.481637	9325	0.812079	53.5824	0.623657	5.4	0.41	52.32	0.86
10484	0.569552	54.189	0.594008	9300	-0.00148624	53.1325	0.601031	2.85	4.48	37.69	1.4
10394	0.604347	53.4872	1.19596	9240	0.710594	52.6849	0.553522	1.75	3.08	43.43	1.24
10339	1.26553	52.3191	0.68108	9180	0.695211	53.187	0.641452	1.45	5.02	20.17	0.84
10239	0.471377	55.1165	0.0599553	9130	0.628662	52.3527	1.25459	1	0.27	52.79	1.1
10199	0.702001	54.0962	0.0929864	9090	0.17498	51.7728	1.4471	0.8	0.43	50.56	0.77
10159	0.90724	53.7065	0.0448015	9030	0.624084	49.3653	3.89402	0.5	2.35	35.84	1.17
10099	1.37095	53.0473	0.0654649	8970	0.519976	54.141	0.489083	0.3	0.8	49.38	0.98
9999	0.202738	54.9902	0.446244	8920	0.361875	54.1623	0.282412	0	0.35	30.5	0.48
9924	0.358941	54.8339	0.0197181	8870	0.321088	53.08	0.349852	-0.2	1.68	39.21	1.03
9834	1.39208	52.0218	1.13738	8800	0.40797	54.0454	0.345457	-0.49	3.21	20.13	0.57
9789	6.60486	37.8849	3.65004	8710	0.462298	53.7629	0.381961	-0.9	4.54	23.76	0.76
9754	6.55745	38.0664	5.70341	8665	0.616331	53.0158	0.390768	-1.3	2.68	34.9	2.44
9714	5.42903	38.0099	4.69365	8640	0.691563	50.8172	0.377552	-4.8	1.19	47.68	0.87
9654	4.84593	38.7996	6.94131	8595	0.617415	53.1284	0.428564	-6.9	2.3	42.22	1.08
9619	4.49669	43.8889	3.43895	8560	0.799192	52.9297	0.516817	-8.1	0.59	24.95	0.45
9589	5.39804	41.0208	2.8707	8550	0.282822	52.52	0.550468	-9.9	2.67	16.37	0.74
9574	4.47103	39.5973	4.52919	8440	0.714175	51.4207	0.6809	-11.1	1.04	13.13	0.18
9569	3.98034	45.2872	2.5238	8400	1.48332	49.2915	0.965845	-15.7	2.78	24.44	0.59
9541	3.58197	42.7979	2.78539	8300	0.438334	53.8565	0.378843
9481	3.76755	45.1657	1.48932	8270	0.481176	51.3106	0.55904
9419	4.86315	38.1644	3.1538	8180	0.792664	48.9482	1.55578
9329	0.602487	54.6039	0.804045	8120	0.596499	53.5896	0.756455
9279	2.96414	47.7461	2.38832	8080	0.531724	52.3255	0.719702
9234	1.24483	52.6368	0.136746	8040	0.844742	51.2248	0.950376
9044	1.14477	52.8482	0.970188	7990	0.632307	52.2511	0.717716
9019	4.1087	42.2305	1.49848	7940	1.3777	49.463	1.2428
8981	1.73385	46.7723	2.07784	7900	0.843508	51.0825	0.88106
8909	4.20724	42.702	2.49832	7850	0.96819	50.9722	0.911107
8879	4.88949	38.7607	3.18452	7795	1.21759	50.2357	1.27273
8714	3.45963	44.7098	1.43666	7755	0.90537	30.9916	17.5841
8582	4.66722	43.069	1.83038	7710	1.64894	46.0495	0.43042
8492	2.15357	46.6631	1.16058	7610	0.464165	50.1992	3.44255
8432	1.3959	49.8377	0.672546	7595	1.97857	46.9382	1.4065
8352	3.01988	43.1749	1.26408	7530	0.440843	52.2195	0.870347
8309	6.04799	35.276	1.1559	7485	0.705827	53.5698	0.576205
8275	5.99092	33.4183	1.64328	7420	0.230276	52.4628	0.891848
8192	6.18268	31.6774	2.19182	7355	0.894582	52.9886	0.781018
8157	5.98623	31.6142	2.17887	7285	0.771511	51.7936	0.957534
8127	1.79318	48.3493	0.782021	7255	0.444751	52.0715	0.863486
8072	3.84932	39.2835	1.45305	7235	0.51013	52.1959	0.763058
7930	5.6002	32.6404	2.03973	7165	0.574577	51.7538	0.822151
7888	3.01108	45.3203	1.10887	7135	0.609618	51.8468	0.972155
7787	7.31189	31.31	1.58673	7060	0.226613	52.1592	0.980618
7744	3.03461	43.5213	1.1005	7040	0.695861	53.3386	0.663256
7644	5.21046	32.9783	1.99239	6980	0.365314	51.0425	0.830559
7510	5.18731	33.6955	2.77655	6940	0.769938	50.1311	1.1236
7460	5.25027	35.6104	1.67368	6885	0.770161	50.1927	0.991079
7430	4.03	40.0526	1.15697	6840	0.630235	50.7231	1.02307
7380	4.2436	38.0958	1.42703	6750	0.430686	52.2151	0.740604
7340	4.89459	37.0407	1.4207	6680	0.347087	51.9189	0.7327
7220	1.67036	48.876	0.725034	6585	0.152751	52.0727	0.851228
7170	2.03265	47.7391	0.955456	6555	2.05015	46.414	1.3544
7130	1.99763	48.3325	0.708162	6550	0.648237	50.9012	0.901787
6493	3.65057	39.5356	1.20741	6495	0.196198	51.8614	0.883526
5451	3.11447	39.0197	1.36571	6460	0.816565	49.4707	1.11194
5281	2.39491	41.6388	0.992848	6420	0.836774	51.2583	1.05965
5041	5.76473	33.82	3.33016	6365	0.896338	49.608	2.04313
4663	5.02919	35.8694	2.24812	6320	0.287065	52.115	1.31037
4587	5.89084	38.829	1.89707	6270	1.09099	49.5477	0.963614
4541	4.69424	38.2647	1.85858	6220	0.758274	49.9917	1.41428
4355	4.88474	39.6149	1.51737	6155	-0.434154	51.5508	1.08676
4310	4.4032	40.6035	1.63031	6075	2.19998	36.3753	9.77281
4195	5.57768	35.6922	1.35056	6025	0.330766	48.2892	3.71866
4125	5.70841	36.3159	1.54322	5990	1.01467	47.3408	3.10743
4060	3.23015	44.206	2.25496	5945	1.38692	41.8307	6.58808
3895	5.40028	34.8072	3.7698	5910	2.42299	39.2635	5.65251
3832	6.03181	32.1747	1.89977	5845	1.14757	38	6.54695
3735	5.09891	35.9312	2.04927	5785	1.04928	42.1734	4.88055
3593	5.65641	34.2806	2.92953	5745	2.91095	45.5828	1.83906
3560	5.66409	34.6369	2.88982	5690	1.85003	48.936	1.765
3483	6.01275	34.1412	2.39444	5655	2.45541	40.2957	3.59344
3428	6.69625	31.6107	2.55983	5600	2.99999	39.3039	3.96049
3358	5.05195	35.0913	1.8984	5555	2.28892	41.7066	3.21178
3265	5.30118	35.4005	3.00108	5490	2.27899	39.4583	4.99945
3144	7.26953	22.0709	5.666	5420	1.87733	41.5577	4.5367
3043	5.5695	35.4282	2.30796	5370	1.98565	41.7545	3.36805
2966	7.03078	28.3804	2.96922	5300	1.64537	45.0707	2.57047
2893	5.05465	33.3288	3.27451	5250	0.877305	47.534	2.2165
2870	6.23061	31.9353	3.05701	5190	1.01539	44.305	2.56247
2815	3.92316	38.1341	2.77219	5130	0.910112	46.7147	1.67048
2790	6.84915	31.0495	2.32261	5080	1.85397	43.7297	1.94055
2591	7.43767	26.9268	3.2778	5040	1.5804	40.7436	2.58078
2530	5.9549	31.2594	3.2208	5000	0.956062	43.3357	2.35263
2477	6.68418	30.7885	3.06721	4940	0.845667	45.0616	1.42039
2357	6.8862	29.6687	3.0452	4890	0.156648	50.987	1.48226
2238	4.65102	39.4632	2.92071	4795	0.772634	54.7584	0.314907
2168	5.01649	39.7169	2.50997	4725	0.590213	51.3686	1.35838
2135	4.13446	41.4139	2.51015	4625	0.628251	52.396	0.79414
2060	4.79635	39.7827	2.64535	4525	0.309219	49.8226	0.974001
1995	6.63334	30.9026	2.79589	4465	0.716343	45.1698	1.89524
1892	4.71238	35.3835	2.42627	4390	0.140158	49.5538	1.80534
1680	6.82143	32.3862	1.9392	4310	0.228634	49.5204	1.61598
1600	6.95041	32.2397	1.54804	4200	0.300161	51.3261	0.940061
1511	4.69949	40.3927	1.61079	4145	1.64413	45.3385	2.39216
1485	6.27717	35.8168	1.64653	4050	0.17516	51.0065	0.921505
1440	6.3696	34.3033	1.43023	3980	0.407919	51.3222	0.876204
1322	7.05981	32.9565	2.16243	3920	0.765181	49.4312	1.11056
1295	6.23322	33.7593	1.6263	3850	0.776176	47.3845	1.98725
1227	6.18629	33.9101	1.7693	3685	1.56038	47.5491	1.86148
1207	6.22151	33.1617	1.98552	3525	0.851984	50.4791	0.999078
1157	5.39652	33.6116	2.1913	3460	0.617707	50.896	0.990772
1100	5.3981	35.9343	1.98788	3440	2.26723	39.5724	4.24335
1073	6.04629	33.9208	1.56202	3360	1.2564	43.5941	1.75362
1002	6.31078	34.4663	1.71119	3140	2.60722	42.7095	2.09125
994	6.97469	31.0277	1.69207	3040	1.62878	41.2692	1.86981
883	5.21706	38.1666	2.08183	2920	1.65615	42.9078	1.5589
-222.5	0.764277	28.9967	0.183591	2845	2.07161	39.3646	4.00158
-422.5	3.81579	43.7197	7.93138	2740	1.30331	44.1364	1.60647
				2635	2.92585	39.3632	1.54352
				2540	1.60083	46.2529	1.3369
				2460	3.70377	33.7666	3.86568
				2370	4.38575	33.4478	2.9773
				2220	1.72191	47.704	0.99854
				2055	1.39698	44.7393	1.24356
				1950	4.27729	33.4768	2.75369
				1845	2.13746	46.5716	1.15383
				1720	0.674721	51.3904	0.950222
				1565	1.57502	48.1794	1.28321
				1425	1.37026	47.8992	1.17353
				1180	2.50488	44.2023	1.35433
				1020	1.48041	48.8895	1.11186
				830	4.1972	37.7616	3.26003
				725	5.20367	33.0326	2.18377
				635	5.26534	34.5765	2.24124
				540	3.86249	39.3542	1.69958
				390	3.47101	37.0649	1.56918
				165	2.33919	35.9812	4.80029
				80	2.44577	43.9299	2.255
				0	3.26392	34.9019	3.91929
